# Supplementary material for: Leukocyte mono-immunoglobulin-like receptor 8 (LMIR8)/CLM-6 is an FcRγ-coupled receptor selectively expressed in mouse tissue plasmacytoid dendritic cells
Source: Sci Rep. 2018 May 29;8:8259. doi: 10.1038/s41598-018-25646-8 (PMC5974347; doi:10.1038/s41598-018-25646-8)

**Leukocyte mono-immunoglobulin-like receptor 8 (LMIR8)/CLM-6 is an FcR $\gamma$ -coupled receptor selectively expressed in mouse tissue plasmacytoid dendritic cells**

**Ayako Kaitani<sup>1,2</sup>, Kumi Izawa<sup>1,2</sup>, Akie Maehara<sup>1,2</sup>, Masamichi Isobe<sup>1,2</sup>, Ayako Takamori<sup>1</sup>, Toshihiro Matsukawa<sup>2,3</sup>, Mariko Takahashi<sup>2</sup>, Yoshinori Yamanishi<sup>2,4</sup>, Toshihiko Oki<sup>2</sup>, Hiromichi Yamada<sup>1,5</sup>, Masakazu Nagamine<sup>1</sup>, Shino Uchida<sup>1,6</sup>, Koichiro Uchida<sup>1</sup>, Tomoaki Ando<sup>1</sup>, Keiko Maeda<sup>1</sup>, Nobuhiro Nakano<sup>1</sup>, Toshiaki Shimizu<sup>1,5</sup>, Toshiyuki Takai<sup>7</sup>, Hideoki Ogawa<sup>1</sup>, Ko Okumura<sup>1</sup>, Toshio Kitamura<sup>2</sup>, and Jiro Kitaura<sup>1,2</sup>**

<sup>1</sup>Atopy (Allergy) Research Center, Juntendo University Graduate School of Medicine, 2-1-1 Hongo, Bunkyo-ku, Tokyo 113-8421, Japan.

<sup>2</sup>Division of Cellular Therapy/Division of Stem Cell Signaling, The Institute of Medical Science, The University of Tokyo, 4-6-1 Shirokanedai, Minato-ku, Tokyo 108-8639, Japan.

<sup>3</sup>Department of Hematology, Hokkaido University Graduate School of Medicine, Sapporo, Hokkaido 060-0808, Japan.

<sup>4</sup>Department of Immune Regulation, Graduate School of Medical and Dental Sciences, Tokyo Medical and Dental University, Tokyo 113-8510, Japan.

<sup>5</sup>Department of Pediatrics and Adolescent Medicine, Juntendo University Graduate School of Medicine, 2-1-1 Hongo, Bunkyo-ku, Tokyo 113-8421, Japan.

<sup>6</sup>Departments of Gastroenterology Immunology, Juntendo University Graduate School of Medicine, 2-1-1 Hongo, Bunkyo-ku, Tokyo 113-8421, Japan.

<sup>7</sup>Department of Experimental Immunology, Institute of Development, Aging, and Cancer, Tohoku University, 4-1 Seiryō, Sendai 980-8575, Japan

Corresponding author:

Toshio Kitamura, M.D. Ph.D., Division of Cellular Therapy, Advanced Clinical Research Center, The Institute of Medical Science, The University of Tokyo, 4-6-1 Shirokanedai, Minato-ku, Tokyo 108-8639, Japan; Phone: (+81-3) 5449-5759; Fax: (+81-3) 5449-5428; email: [kitamura@ims.u-tokyo.ac.jp](mailto:kitamura@ims.u-tokyo.ac.jp) and

Jiro Kitaura. M.D. Ph.D., Atopy Research Center, Juntendo University Graduate School of Medicine, 2-1-1 Hongo, Bunkyo-ku, Tokyo 113-8421, Japan; Phone (+81-3) 5802-1591; Fax: (+81-3) 3813-5512; email: [j-kitaura@juntendo.ac.jp](mailto:j-kitaura@juntendo.ac.jp)

## **Supplementary Figure legends**

**Supplementary Figure 1. Full-length gel and blot images for Figure 1b and Figure 1d.**

**Supplementary Figure 2. Full-length blot images for Figure 2c.**

**Supplementary Figure 3. Full-length blot images for Figure 3c and Figure 3f.**

**Supplementary Figure 4. LMIR8 can transmit an activating signal in transduced BMMCs.**

**(a)** BMMCs transduced with Flag-tagged LMIR8 were stimulated with plate-coated anti-LMIR8 Ab or a control Ab or PBS as a control for 1 h. Transcript levels of IL-6 quantified by real-time RT-PCR analysis in BMMCs transduced with Flag-tagged LMIR8. Data are expressed. **(b)** BMMCs transduced with Flag-tagged LMIR8 were stimulated with plate-coated anti-LMIR8 Ab or a control Ab with or without 1000 ng/ml LPS for 24 h. IL-6 released into the culture supernatants were measured by ELISA. All data points correspond to the mean  $\pm$  S.D. of three independent experiments. Statistically significant differences are shown. Statistically significant differences are shown. \* $p < 0.01$  (Student's *t*-test).

Supplementary Figure 1: Full-length gel and blot images for Figures 1

(Figure 1b)

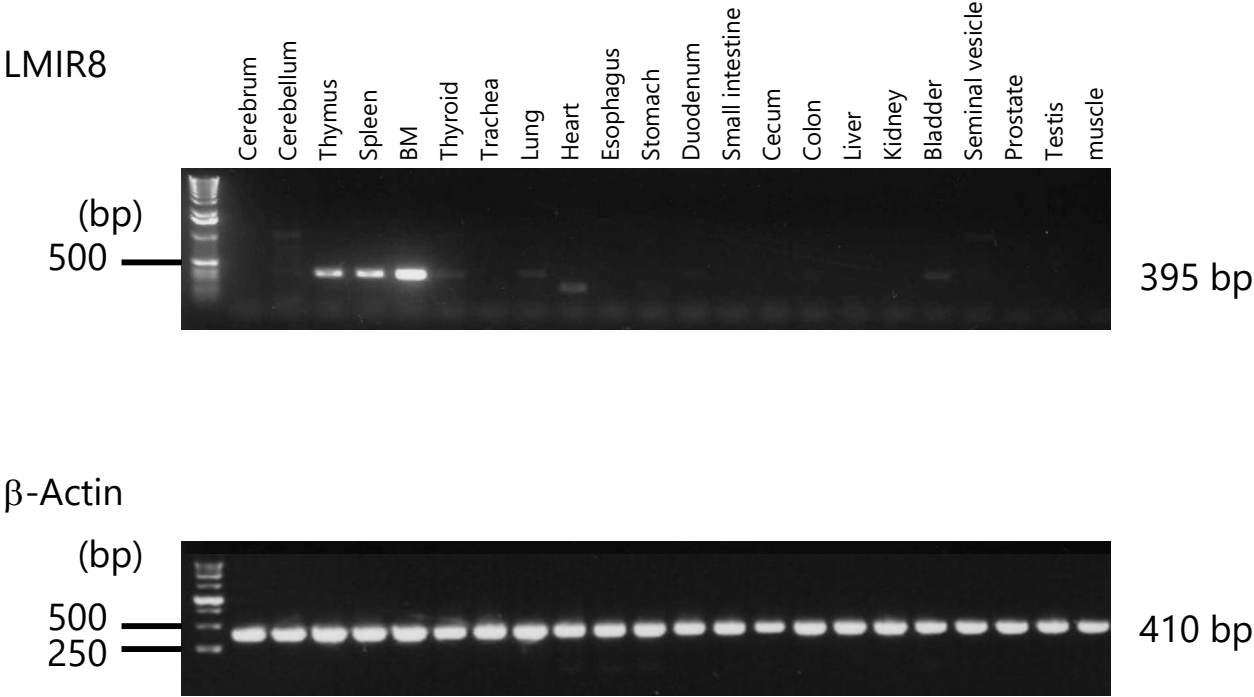

(Figure 1d)

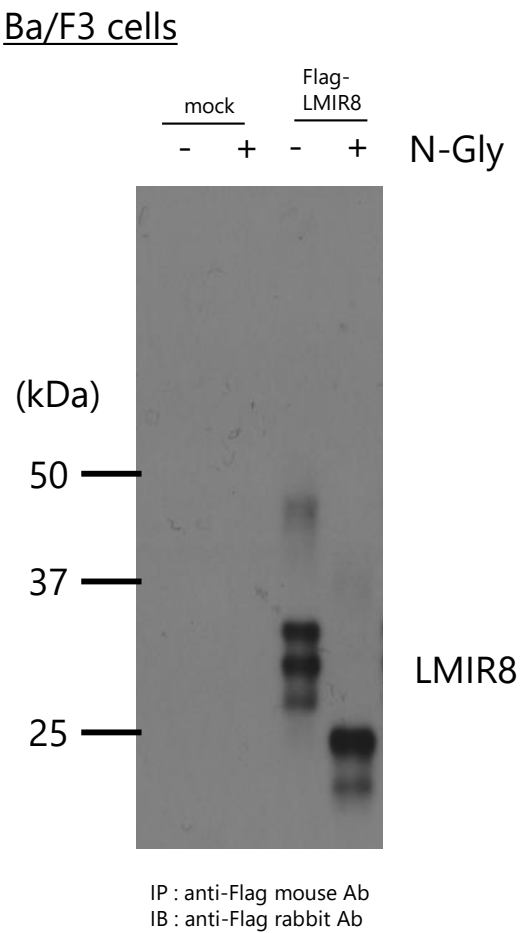

Supplementary Figure S2: Full-length blot images for Figures 2

(Figure 2c)

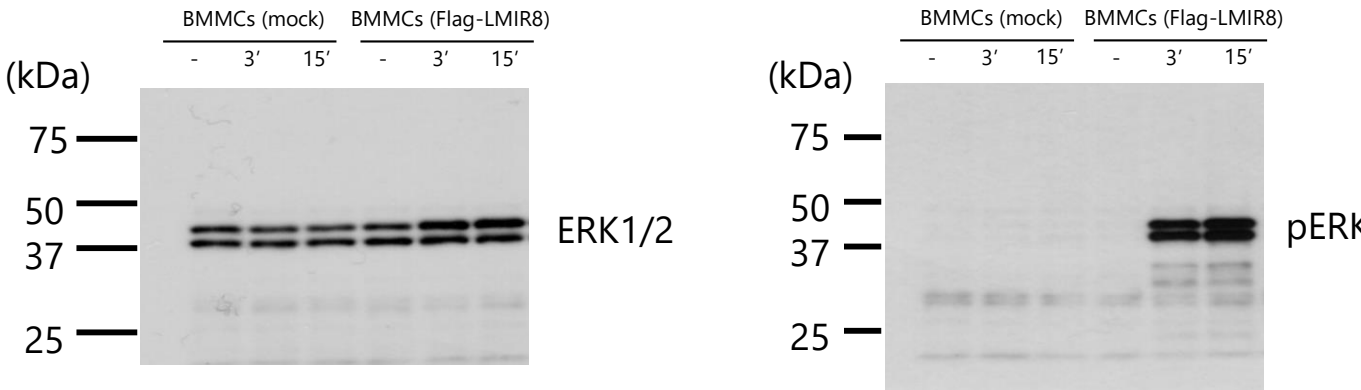

Supplementary Figure S3: Full-length blot images for Figures 3

(Figure 3c)

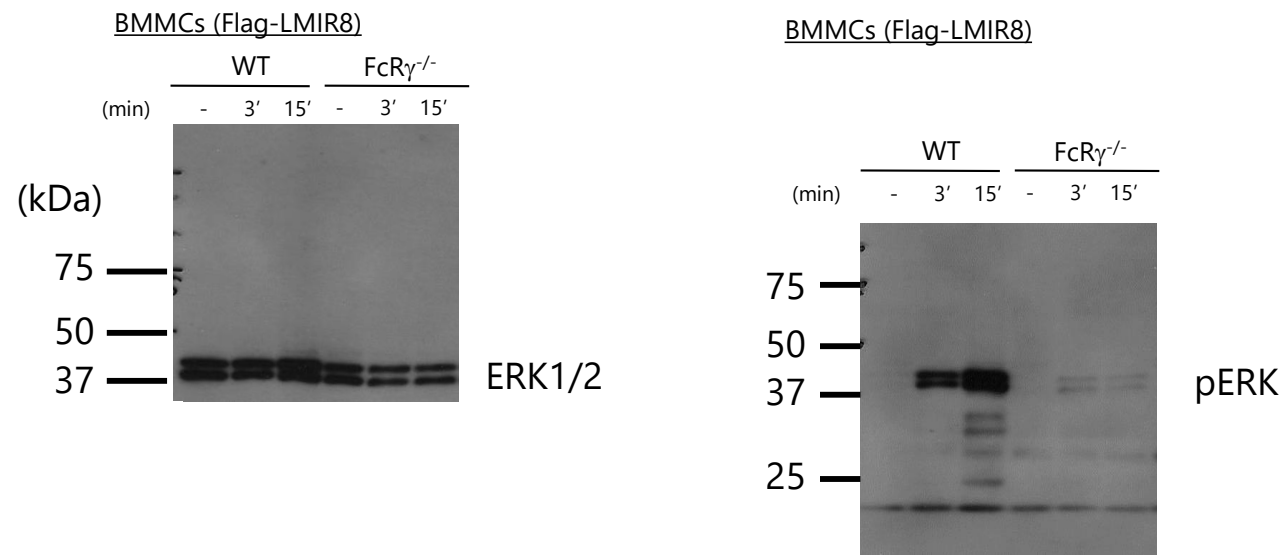

(Figure 3f)

293T cells

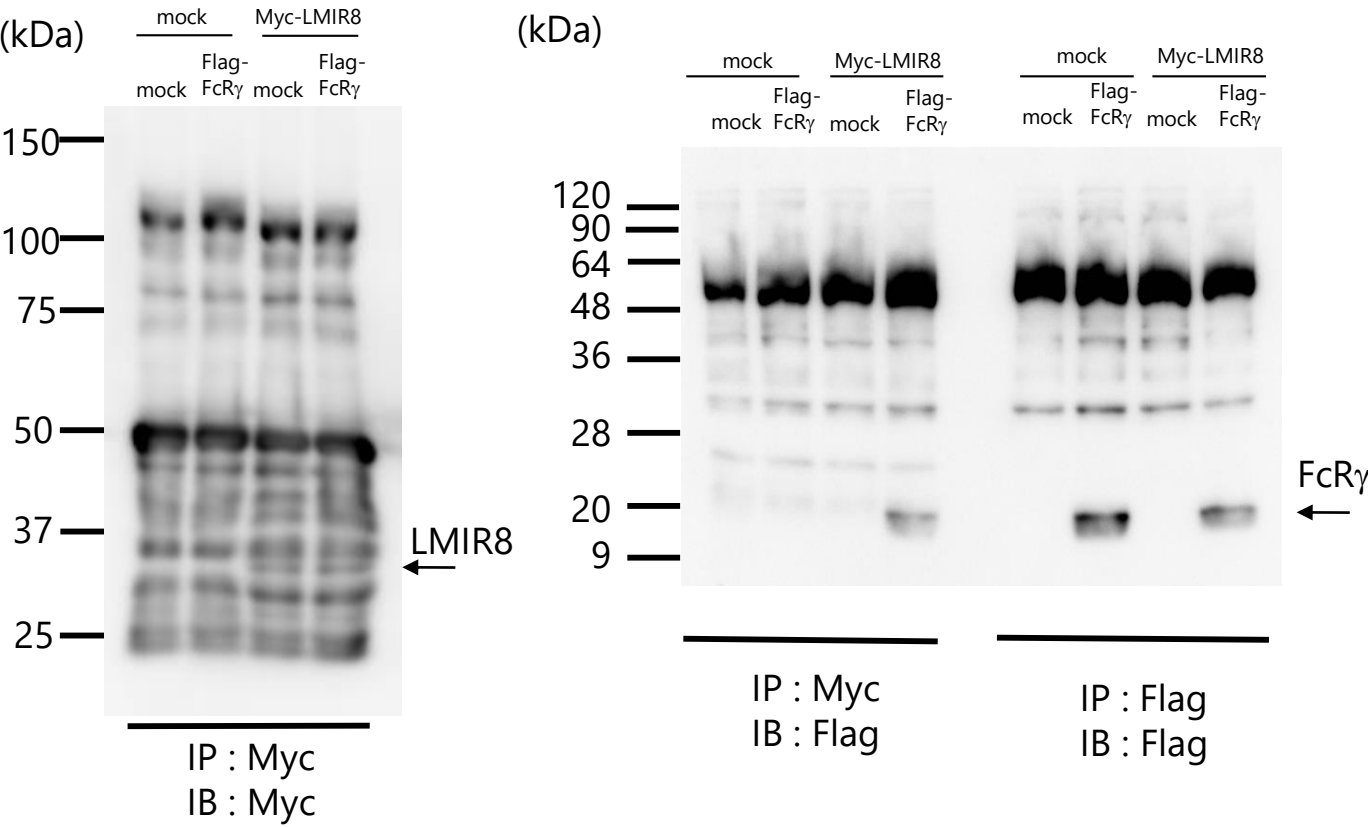

Supplementary Figure S4

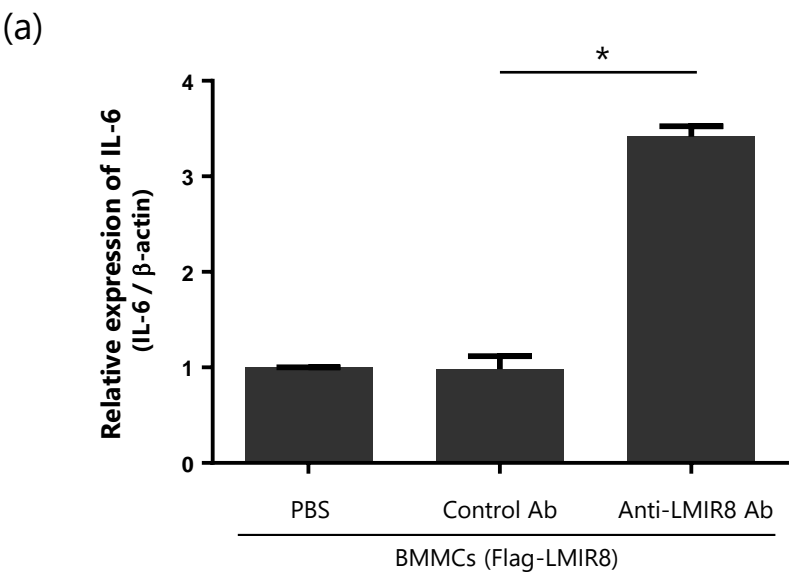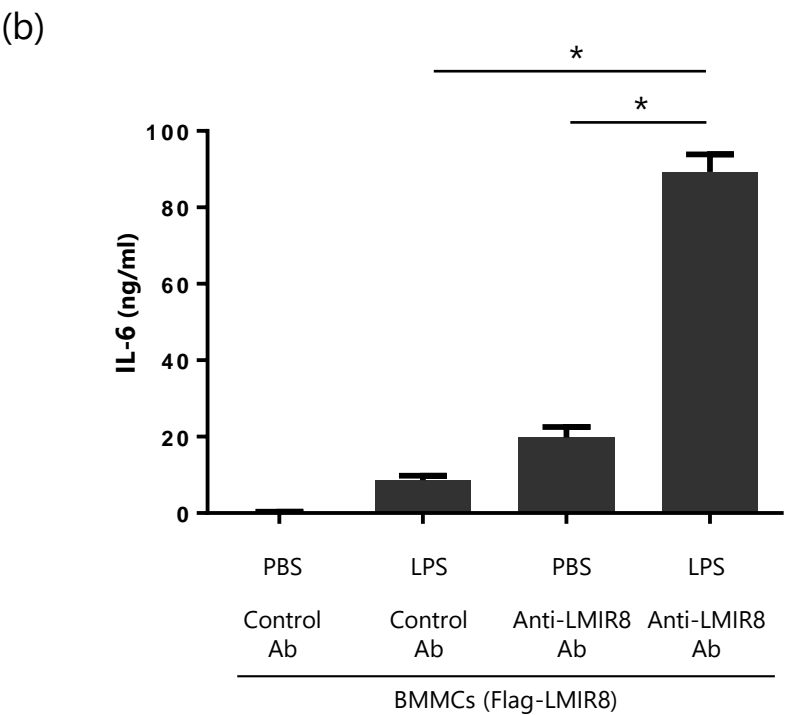

Supplement: Supplementary file 1 — Supplemental information [file 41598_2018_25646_MOESM1_ESM.pdf]
